# Supplementary material
Source: Springer Nature journal article supplement (https://www.springermedizin.de/resource/supplementary/12943_2014_1439_MOESM2_ESM.pdf/9552984)

**A**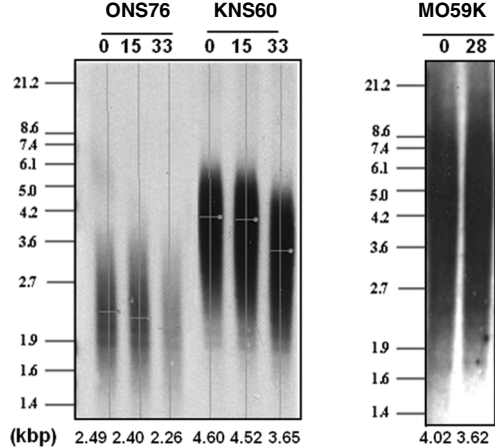**B**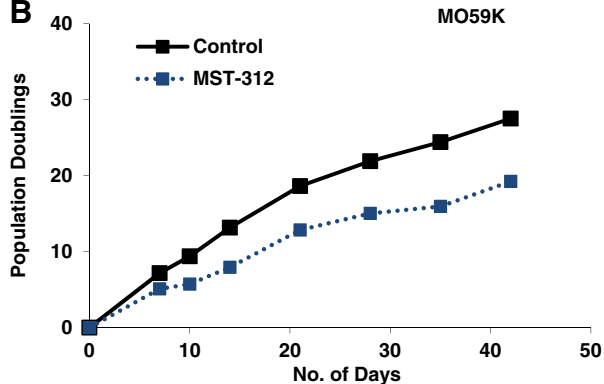**C**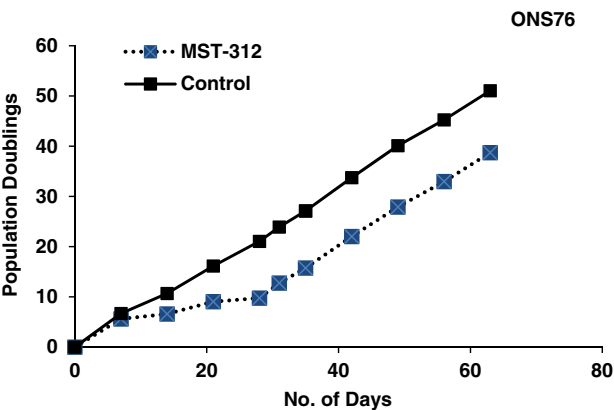**D**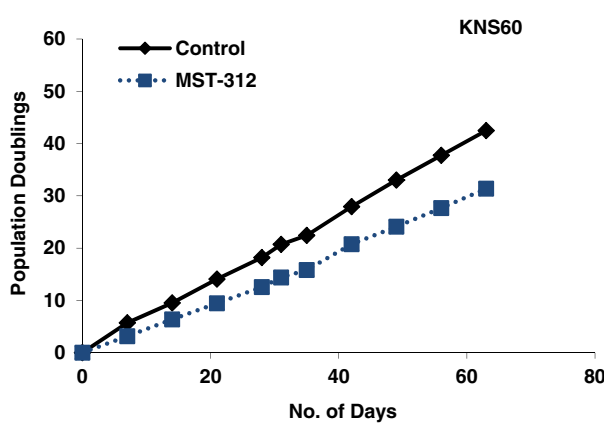

Supplement: MOESM2 [file 9552984]
